# Supplementary material
Source: publisher figshare collection journal article supplement (https://acs.figshare.com/ndownloader/files/13664933)
Supplement: Supplementary file 1 [file 13664933]

# **Experimental Evidence for a Triplet Biradical Excited-State Mechanism in the Photoreactivity of N,C-Chelate Organoboron Compounds**

## **Supporting Information**

Soren K. Mellerup<sup>\$</sup>, Goonay Yousefalizadeh<sup>\$</sup>, Suning Wang\* and Kevin Stamplecoskie\*

Department of Chemistry, Queen's University, Kingston, Ontario K7L3N6, Canada

\* [Suning.wang@chem.queensu.ca](mailto:Suning.wang@chem.queensu.ca)

\* [kevin.stamplecoskie@queensu.ca](mailto:kevin.stamplecoskie@queensu.ca)

**Section S1. Steady-State Absorbance and Fluorescence Data of 1–3 in THF.**

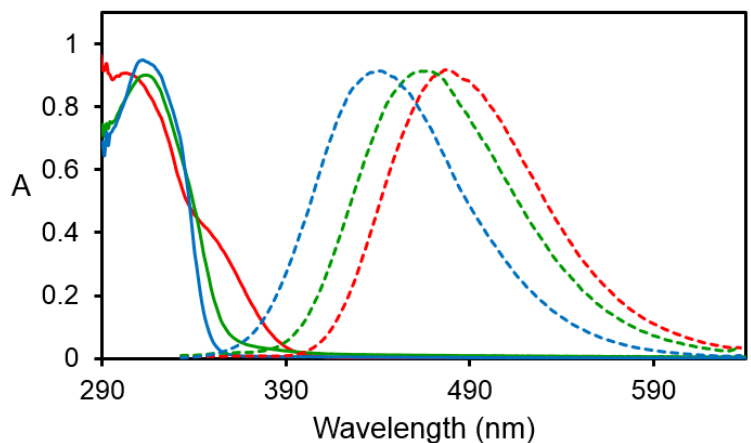

**Figure S1.** UV/vis (solid) and fluorescence (dashed) spectra of **1–3** in THF at  $10^{-4}$  M.

**Table S1.** Summary of the steady-state photophysical properties for **1–3**.

|          | $\lambda_{\text{abs}}$ , nm ( $\epsilon$ ; $\text{M}^{-1} \text{cm}^{-1}$ ) | $\lambda_{\text{em}}$ , nm | $\Phi_{\text{em}}$ ( $\pm 0.05$ ) |
|----------|-----------------------------------------------------------------------------|----------------------------|-----------------------------------|
| <b>1</b> | 312, 345(bs) (9075)                                                         | 477                        | 0.28                              |
| <b>2</b> | 315 (9023)                                                                  | 468                        | 0.20                              |
| <b>3</b> | 315 (9518)                                                                  | 441                        | 0.37                              |

\*bs = broad shoulder; Measured in THF at  $10^{-4}$  M.

## Section S2. Excited-State Dynamics of 1–3.

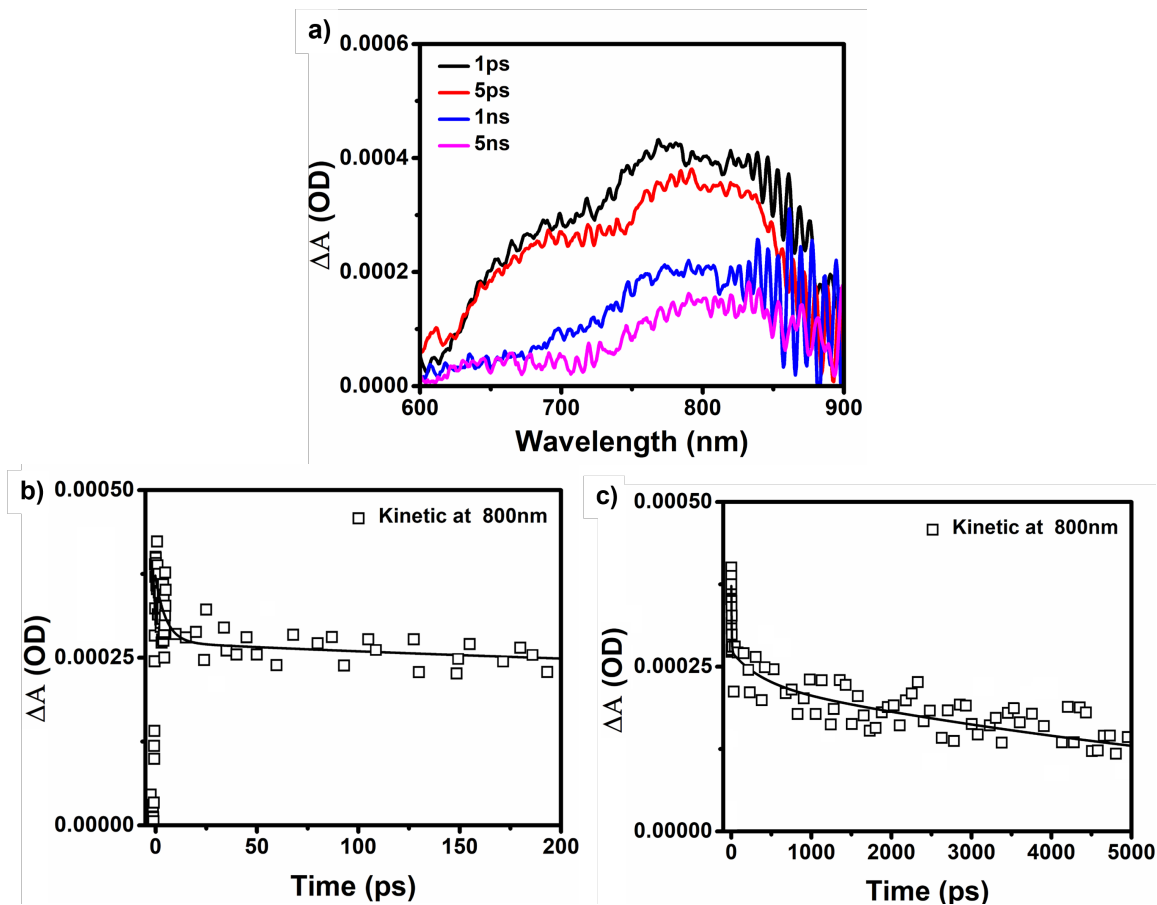

**Figure S2.** Femtosecond transient  $\Delta A$  spectra of compound **1** at varying delay times ( $t = 1, 5, 1000$ , and  $5000$  ps) in THF (a), and decay traces with corresponding fits monitored at 800 nm over short (200 ps; b) and long (5 ns; c) time intervals.

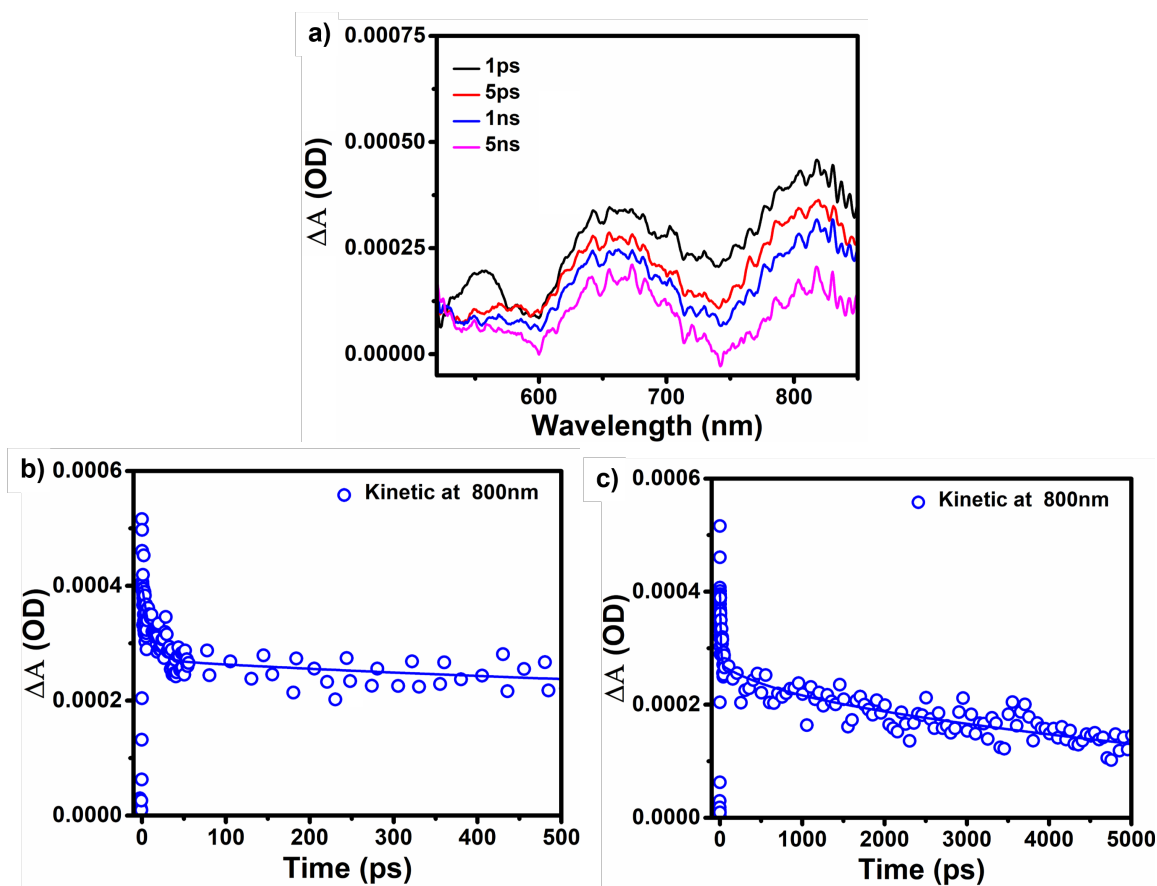

**Figure S3.** Femtosecond transient  $\Delta A$  spectra of compound **2** at varying delay times ( $t = 1, 5, 1000$ , and  $5000$  ps) in THF (a), and decay traces with corresponding fits monitored at 800 nm over short (200 ps; b) and long (5 ns; c) time intervals.

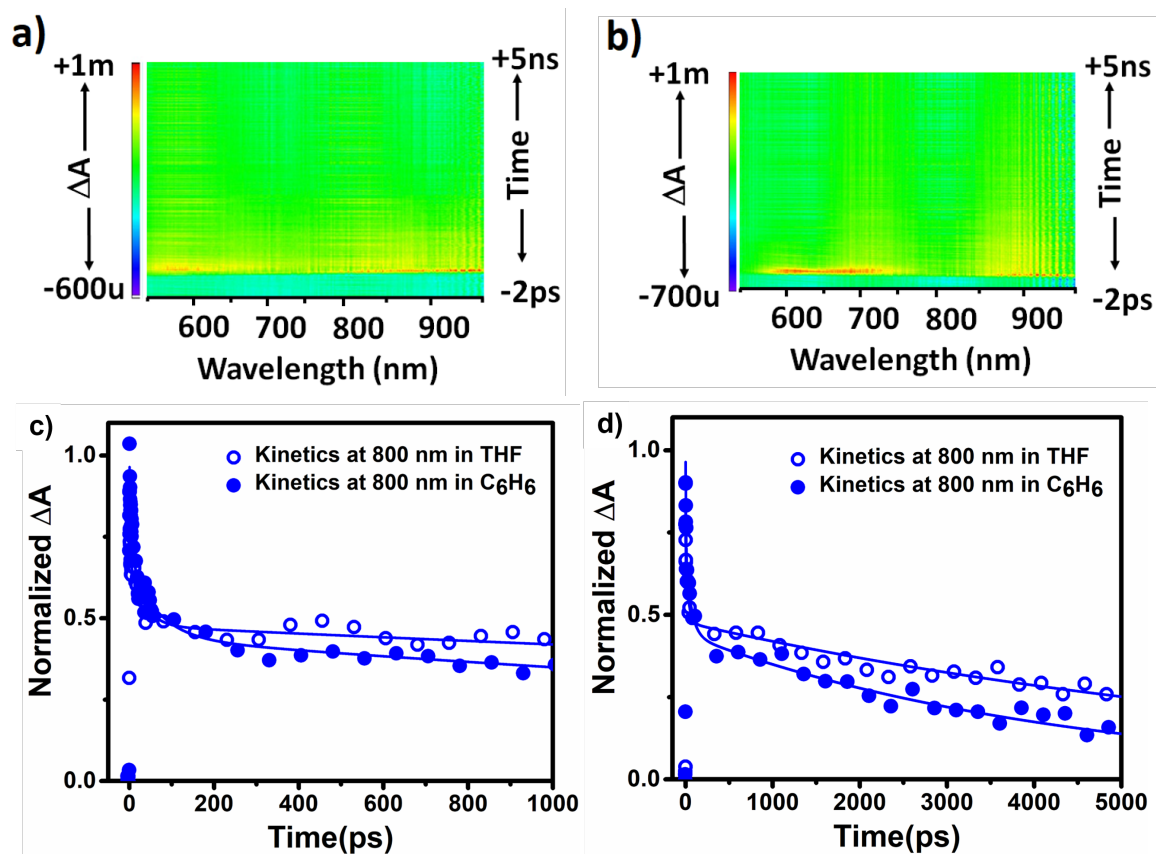

**Figure S4.** Femtosecond transient  $\Delta A$  spectra of compound **2** up to 5 ns with 340 nm excitation in  $C_6H_6$  (a) and THF (b), as well as the overlaid kinetic plots (c) at 800 nm over short (left) and long (right) time intervals.

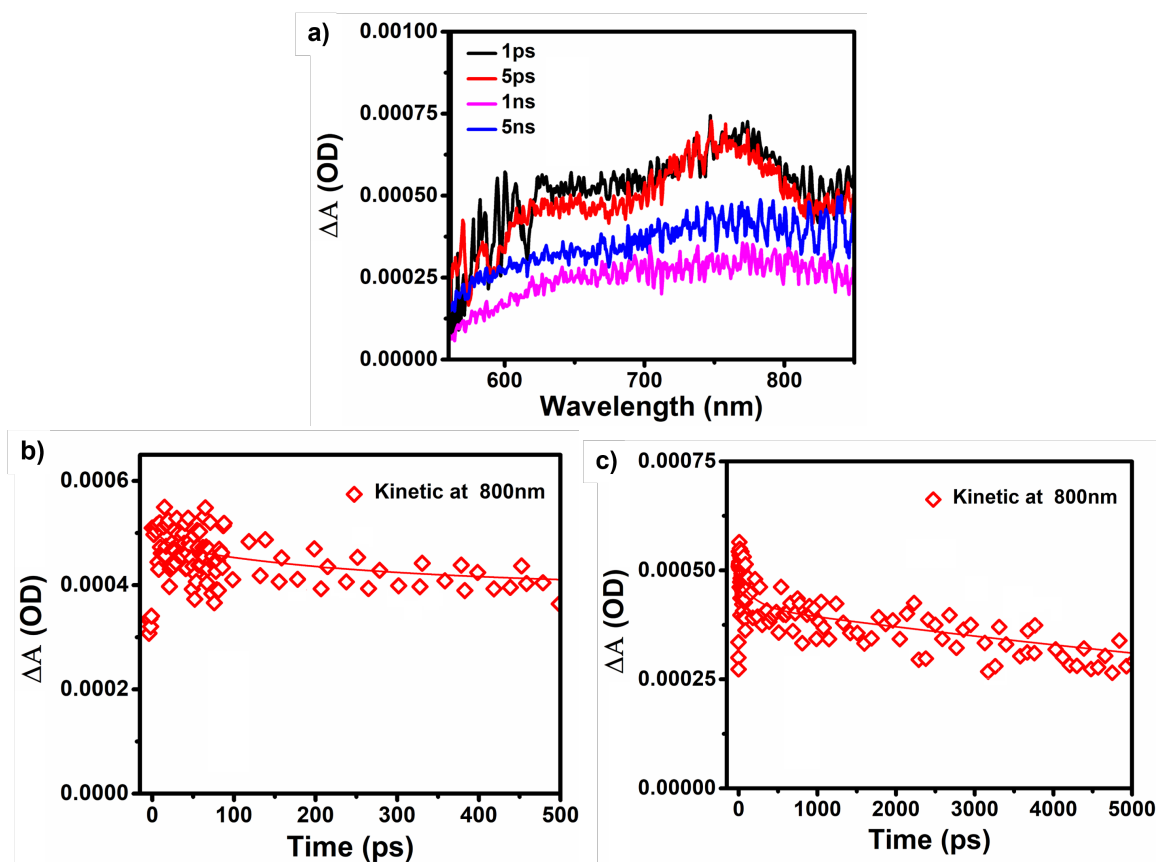

**Figure S5.** Femtosecond transient  $\Delta A$  spectra of compound **3** at varying delay times ( $t = 1, 5, 1000$ , and  $5000$  ps) in THF (a), and decay traces with corresponding fits monitored at 800 nm over short (200 ps; b) and long (5 ns; c) time intervals.

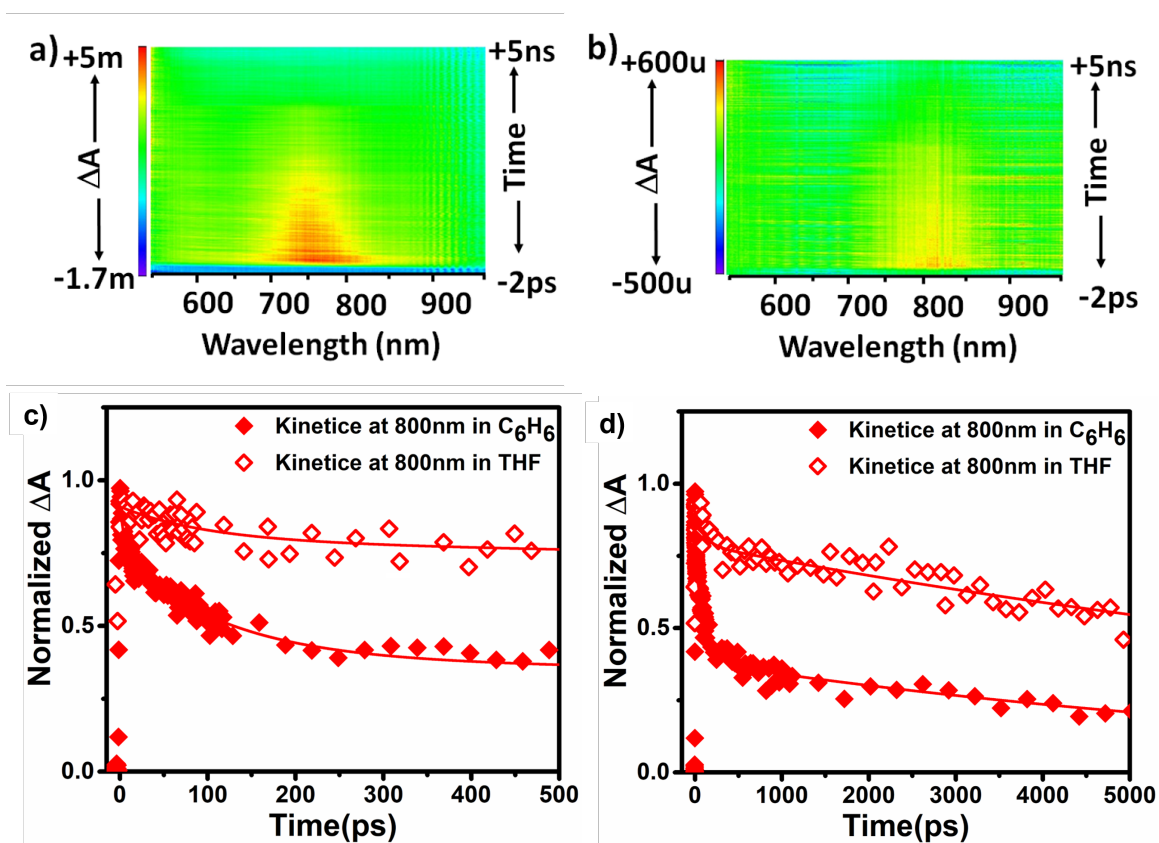

**Figure S6.** Femtosecond transient  $\Delta A$  spectra of compound **3** up to 5 ns with 340 nm excitation in  $\text{C}_6\text{H}_6$  (a) and THF (b), as well as the overlaid kinetic plots (c) at 800 nm over short (left) and long (right) time intervals.

### Section S3. Long Lifetimes of 1–3.

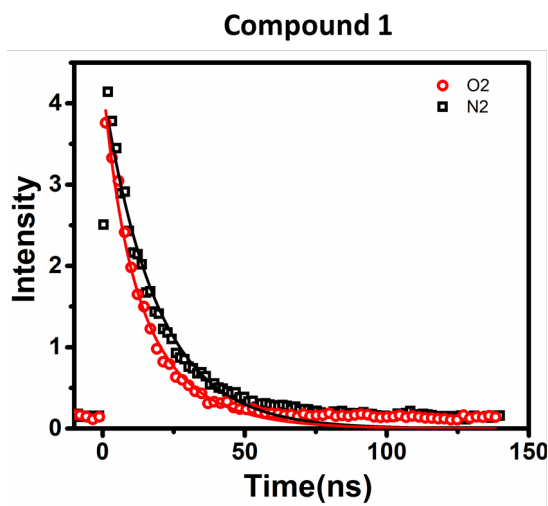

| $t_1(\text{ns})$ | $t_2(\text{ns})$ | $K_1(\text{ns}^{-1}\text{M})$ | $K_2(\text{ns}^{-1}\text{M})$ |
|------------------|------------------|-------------------------------|-------------------------------|
| 18.82            | 7.03             | 0.052                         | 0.142                         |

$$\tau_1 = \frac{1}{K_1} = \frac{1}{0.052} = 19.23 \text{ ns}$$

$$\langle \tau \rangle = \frac{A_1 \tau_1^2 + A_2 \tau_2^2 + \dots}{A_1 \tau_1 + A_2 \tau_2 + \dots} = \frac{A_1 \tau_1^2}{A_1 \tau_1} = \frac{\tau_1^2}{\tau_1} = \tau_1 = 19.23 \text{ ns}$$

$$K_2 = K_Q[Q]$$

$$k_Q = \frac{0.142\text{E}9}{0.04} = 3.55\text{E}9 \text{ s}^{-1}\text{M}$$

**Figure S7.** Stead-state luminescence lifetimes of **1** measured in  $\text{C}_6\text{H}_6$  under  $\text{N}_2$  (black) and atmospheric conditions (red) at  $10^{-4}\text{M}$ , as well as their calculated mono-exponential decays and  $K_Q$ .<sup>1</sup>

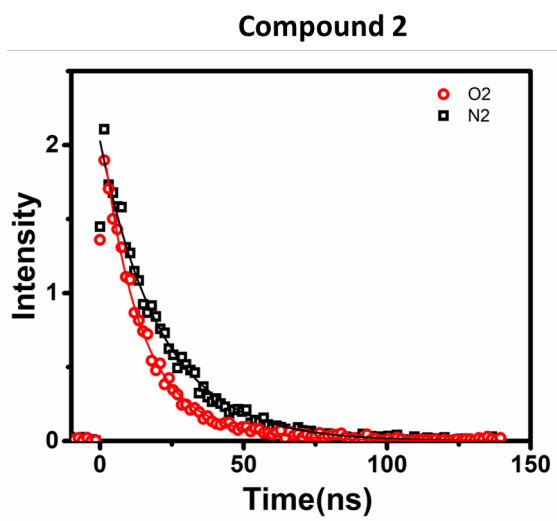

| $t_1(\text{ns})$ | $t_2(\text{ns})$ | $K_1(\text{ns}^{-1}\text{M})$ | $K_2(\text{ns}^{-1}\text{M})$ |
|------------------|------------------|-------------------------------|-------------------------------|
| 21.14            | 11.13            | 0.047                         | 0.089                         |

$$\tau_1 = \frac{1}{K_1} = \frac{1}{0.047} = 21.27 \text{ ns}$$

$$\langle \tau \rangle = \frac{A_1 \tau_1^2 + A_2 \tau_2^2 + \dots}{A_1 \tau_1 + A_2 \tau_2 + \dots} = \frac{A_1 \tau_1^2}{A_1 \tau_1} = \frac{\tau_1^2}{\tau_1} = \tau_1 = 21.27 \text{ ns}$$

$$K_2 = K_Q[Q]$$

$$k_Q = \frac{0.089\text{E}9}{0.04} = 2.24\text{E}9 \text{ s}^{-1}\text{M}$$

**Figure S8.** Stead-state luminescence lifetimes of **2** measured in  $\text{C}_6\text{H}_6$  under  $\text{N}_2$  (black) and atmospheric conditions (red) at  $10^{-4}\text{M}$ , as well as their calculated mono-exponential decays and  $K_Q$ .<sup>1</sup>



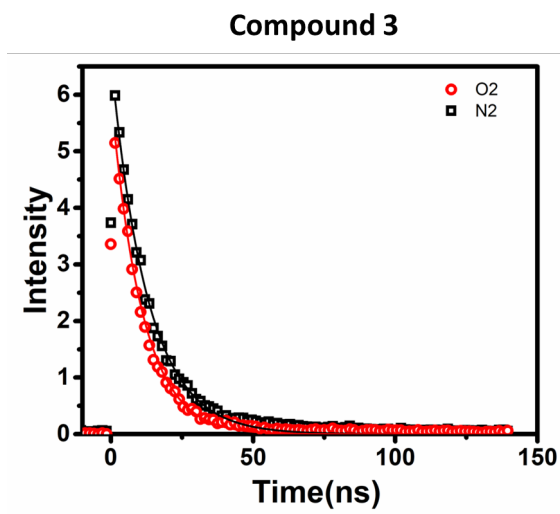

| $\tau_1(\text{ns})$ | $\tau_2(\text{ns})$ | $K_1(\text{ns}^{-1}\text{M})$ | $K_2(\text{ns}^{-1}\text{M})$ |
|---------------------|---------------------|-------------------------------|-------------------------------|
| 12.74               | 10.77               | 0.078                         | 0.092                         |

$$\tau_1 = \frac{1}{K_1} = \frac{1}{0.078} = 12.75 \text{ ns}$$

$$\langle \tau \rangle = \frac{A_1 \tau_1^2 + A_2 \tau_2^2 + \dots}{A_1 \tau_1 + A_2 \tau_2 + \dots} = \frac{A_1 \tau_1^2}{A_1 \tau_1} = \frac{\tau_1^2}{\tau_1} = \tau_1 = 12.75 \text{ ns}$$

$$K_2 = K_Q[Q]$$

$$k_Q = \frac{0.092 \text{E}9}{0.04} = 2.32 \text{E}9 \text{ s}^{-1}\text{M}$$

**Figure S9.** Stead-state luminescence lifetimes of **3** measured in  $\text{C}_6\text{H}_6$  under  $\text{N}_2$  (black) and atmospheric conditions (red) at  $10^{-4} \text{ M}$ , as well as their calculated mono-exponential decays and  $K_Q$ .<sup>1</sup>

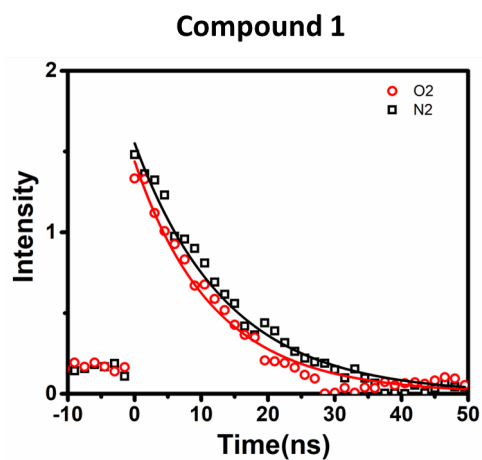

| $t_1(\text{ns})$ | $t_2(\text{ns})$ | $K_1(\text{ns}^{-1}\text{M})$ | $K_2(\text{ns}^{-1}\text{M})$ |
|------------------|------------------|-------------------------------|-------------------------------|
| 13.72            | 9.26             | 0.072                         | 0.107                         |

$$\tau_1 = \frac{1}{K_1} = \frac{1}{0.072} = 13.73 \text{ ns}$$

$$\langle \tau \rangle = \frac{A_1 \tau_1^2 + A_2 \tau_2^2 + \dots}{A_1 \tau_1 + A_2 \tau_2 + \dots} = \frac{A_1 \tau_1^2}{A_1 \tau_1} = \frac{\tau_1^2}{\tau_1} = \tau_1 = 13.73 \text{ ns}$$

$$K_2 = K_Q[Q]$$

$$k_Q = \frac{0.107\text{E}9}{0.0418} = 2.56\text{E}9 \text{ s}^{-1}\text{M}$$

**Figure S10.** Stead-state luminescence lifetimes of **1** measured in THF under N<sub>2</sub> (black) and atmospheric conditions (red) at 10<sup>-4</sup> M, as well as their calculated mono-exponential decays and K<sub>Q</sub>.<sup>2</sup>

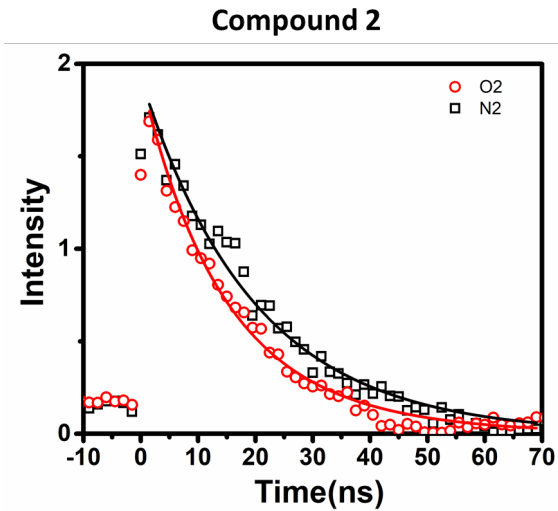

| $t_1(\text{ns})$ | $t_2(\text{ns})$ | $K_1(\text{ns}^{-1}\text{M})$ | $K_2(\text{ns}^{-1}\text{M})$ |
|------------------|------------------|-------------------------------|-------------------------------|
| 19.82            | 11.90            | 0.050                         | 0.083                         |

$$\tau_1 = \frac{1}{K_1} = \frac{1}{0.050} = 19.84 \text{ ns}$$

$$\langle \tau \rangle = \frac{A_1 \tau_1^2 + A_2 \tau_2^2 + \dots}{A_1 \tau_1 + A_2 \tau_2 + \dots} = \frac{A_1 \tau_1^2}{A_1 \tau_1} = \frac{\tau_1^2}{\tau_1} = \tau_1 = 19.84 \text{ ns}$$

$$K_2 = K_Q[Q]$$

$$k_Q = \frac{0.083\text{E}9}{0.0418} = 2.007\text{E}9 \text{ s}^{-1}\text{M}$$

**Figure S11.** Stead-state luminescence lifetimes of **2** measured in THF under N<sub>2</sub> (black) and atmospheric conditions (red) at 10<sup>-4</sup> M, as well as their calculated mono-exponential decays and K<sub>Q</sub>.<sup>2</sup>

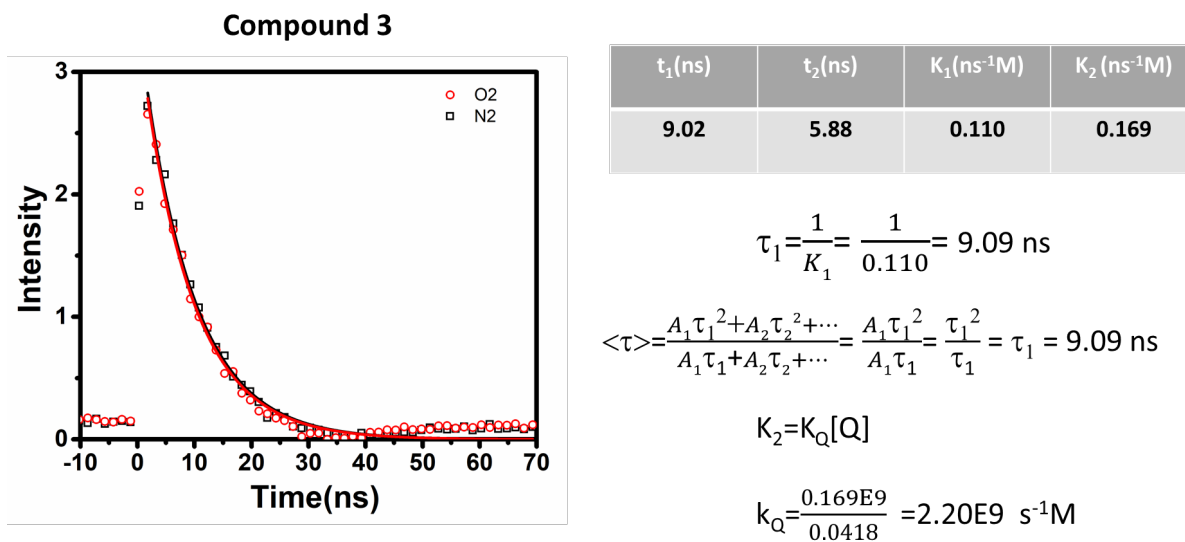

**Figure S12.** Stead-state luminescence lifetimes of **3** measured in THF under N<sub>2</sub> (black) and atmospheric conditions (red) at 10<sup>-4</sup> M, as well as their calculated mono-exponential decays and K<sub>Q</sub>.<sup>2</sup>

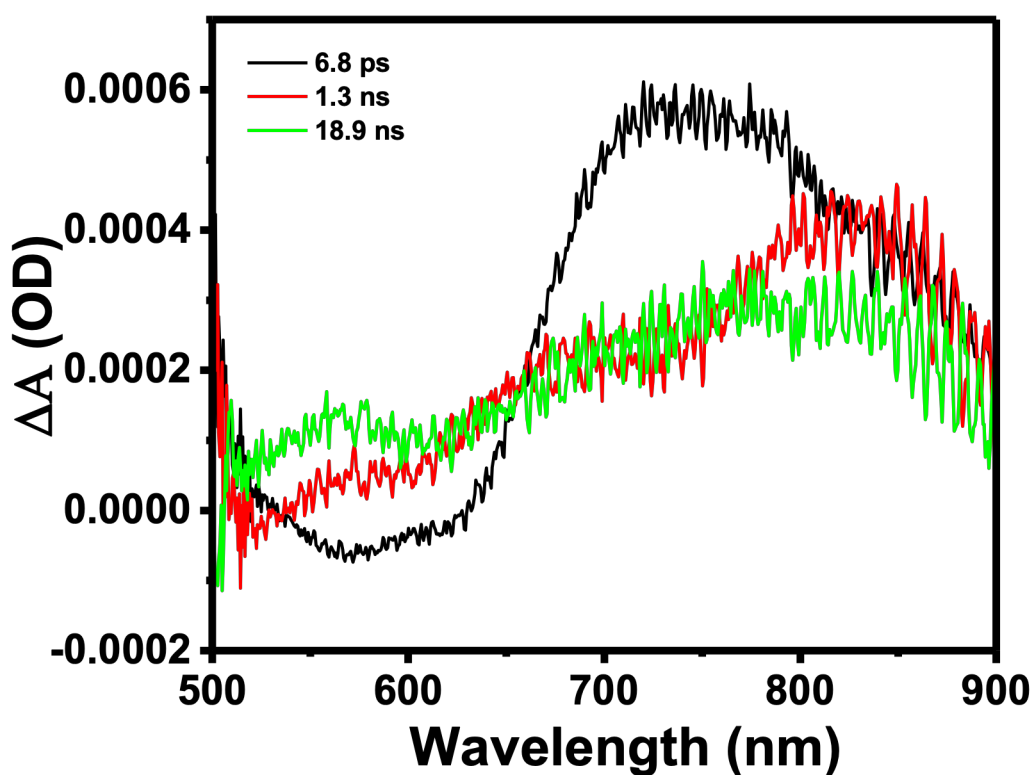

**Figure S13.** Global analysis of decay associated difference spectra for compound 1

#### Section S4. References.

- 1) Sato, T.; Hamada, Y.; Sumikawa, M.; Araki, S.; Yamamoto, H. Solubility of Oxygen in Organic Solvents and Calculation of the Hansen Solubility Parameters of Oxygen. *Ind. Eng. Chem. Res.* **2014**, *53*, 19331–19337.
- 2) Lawrence Clever, H.; Battino, R.; Miyamoto, H.; Yampolski, Y.; Young, C. L. IUPAC-NIST Solubility Data Series. 103. Oxygen and Ozone in Water, Aqueous Solutions, and Organic Liquids (Supplement to Solubility Data Series Volume 7). *J. Phys. Chem. Ref. Data* **2014**, *43*, 033102.
